# Supplementary material
Source: Springer Nature journal article supplement (https://www.springermedizin.de/resource/supplementary/12967_2011_836_MOESM6_ESM.pdf/9577164)

IL-4

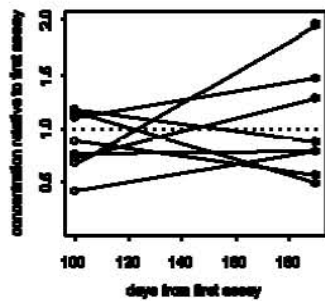

IL-6

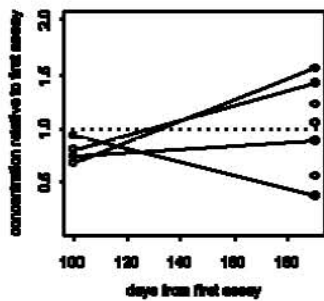

IL-8

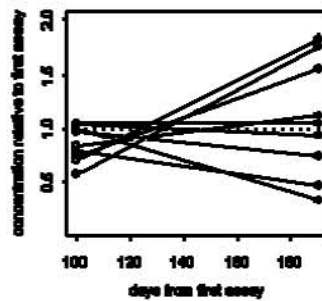

IL-10

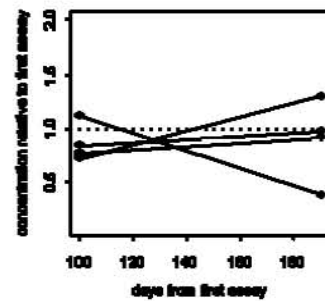

TNF-alpha

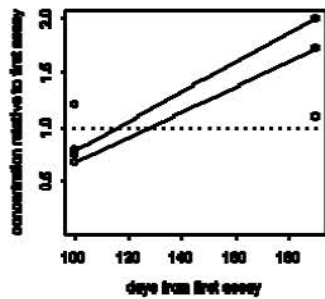

IFN-gamma

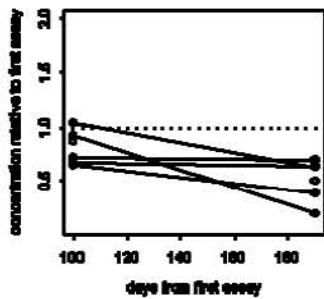

GM-CSF

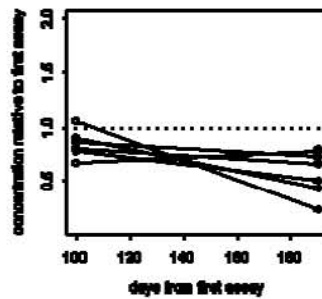

IP-10

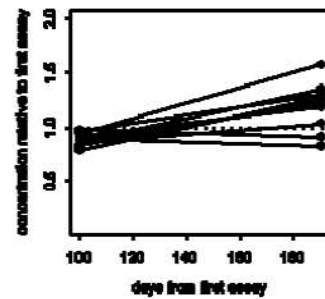

MIG

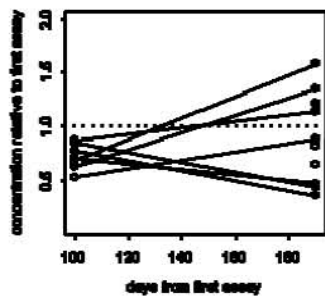

MCP-1

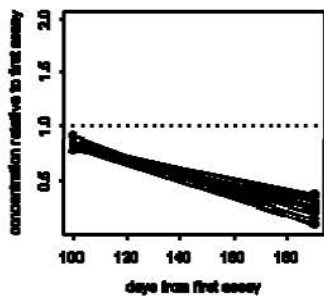

Supplement: MOESM6 [file 9577164]
